# Supplementary material
Source: PubMed Central journal article supplement (PMC5805655)
Supplement: NIHMS928251-supplement-Table_S1.pdf [file NIHMS928251-supplement-Table_S1.pdf]

**Table S1: sgRNA sequences for human and mouse loci**

| locus                              | sgRNA | 5' sequence            | 3' sequence                  |
|------------------------------------|-------|------------------------|------------------------------|
| telomeres                          | 1     | GTTAGGGTTAGGGTTAGGGTTA | TAACCCTAACCCCTAACCCCTAA<br>C |
| <i>GAPDH</i>                       | 1     | TTAATGCTCTCAATGAGAAA   | TTTCTCATTGAGAGCATTAA         |
|                                    | 2     | CTGCCCTTCTAGCTAAAAGC   | GCTTTTAGCTAGAAGGGCAG         |
|                                    | 3     | GCTGCGCCGGGGGATATTGA   | TCAATATCCCCCGGCAGC           |
| <i>FIRRE</i>                       | 1     | ACAGCAAAGACACTTCCAGA   | TCTGGAAGTGTCTTTGCTGT         |
|                                    | 2     | CTAGATGGCGAAAGAGACCT   | AGGTCTCTTTTCGCCATCTAG        |
|                                    | 3     | GAAATGTTGAAAACGAGCAA   | TTGCTCGTTTTCAACATTTT         |
| <i>CISTR-ACT</i>                   | 1     | GGTCGTCAAGACCAACCAAG   | CTTGGTTGGTCTTGACGACC         |
|                                    | 2     | CATATGTAAGGAGACCG      | CGGTCTCCTCAGTACATATG         |
|                                    | 3     | AGAAGTCCCCAACACAAAG    | CTTTGTGTTTGGGGACTTCT         |
|                                    | 4     | GACCTTGAGGGGAGCCCAA    | TTGGGCTCCCCTCCAAGGTC         |
|                                    | 5     | CCAGAAGAGCCCCAATTAGT   | ACTAATTGGGGCTCTTCTGG         |
|                                    | 6     | CCCGCCCCGGATGCCGAGCG   | CGCTCGGCATCCGGGGCGG<br>G     |
| <i>XIST</i>                        | 1     | CCAGAATCTGATATAAAGGG   | CCCTTTATATCAGATTCTGG         |
|                                    | 2     | GTTTATCAAAAGAGAACACG   | CGTGTCTCTTTTGATAAAC          |
|                                    | 3     | GAAACAACAGAGAACCAGAA   | TTCTGGTTCTCTGTTGTTTC         |
| <i>TSIX</i>                        | 1     | TATGCTCTCCAGAAACAGAA   | TTCTGTTTCTGGAGAGCATA         |
|                                    | 2     | ATACTCTTGAGTGTAGCCA    | TGGCTAACACTCAAGAGTAT         |
|                                    | 3     | TCATGTTCTAGGCTATAAAG   | CTTTATAGCCTAGAACATGA         |
| <i>Firre</i>                       | 1     | TTATACTTAATAATAAGGCA   | TGCCTTATTATTAAGTATAA         |
|                                    | 2     | GATCAAATGTAAAGAAAGCA   | TGCTTTCTTTACATTTGATC         |
|                                    | 3     | ATAAATGTCTGTGTTTGCAG   | CTGCAAACACAGACATTTAT         |
| <i>Ypel4, 129S1<br/>rs28029584</i> | 1     | AGAGGCACTGGATTTCGCACC  | GGTGCGAATCCAGTGCCTCT         |
| <i>Ypel4, 129S1<br/>rs28029650</i> | 2     | TCCTGTCCCTGGCGAGCTGC   | GCAGCTCGCCAGGGACAGGA         |
| <i>Ypel4, CAST<br/>rs28029616</i>  | 1     | CACATCCACCTCAAAGGCCG   | CGGCCTTTGAGGTGGATGTG         |
| <i>Ypel4, CAST<br/>rs8273639</i>   | 2     | TTATGTTACTAATGTATCTA   | TAGATACATTAGTAACATAA         |
| <i>chr18, CAST<br/>rs31839508</i>  | 1     | AAATGTGTCTTCCATTACCT   | AGGTAATGGAAGACACATTT         |
| <i>chr18, CAST<br/>rs31842179</i>  | 2     | GCTTTTTAAATCCAAATTCC   | GGAATTTGGATTTAAAAGC          |
| <i>chr18, 129S1<br/>rs31842267</i> | 1     | ACAAAAGATAAACCAACCTC   | GAGGTTGGTTTATCTTTTGT         |
| <i>chr18, 129S1<br/>rs31843018</i> | 2     | AAAGAAAAAGTGGTAAGAAA   | TTTCTTACCACTTTTTCTTT         |
| <i>chr7, CAST<br/>rs33265624</i>   | 1     | CAATAAAAATAAAATGAGAT   | ATCTCATTATTTTTATTG           |
| <i>chr7, CAST<br/>rs33264925</i>   | 2     | CAAGAATAGGGACATCAATA   | TATTGATGTCCCTATTCTTG         |
| <i>chr7, 129S1<br/>rs32528342</i>  | 1     | CAATCTGAACTATCTCTCTT   | AAGAGAGATAGTTCAGATTG         |
| <i>chr7, 129S1</i>                 | 2     | TTCTCAGGGGCAGCTAGGCC   | GGCCTAGCTGCCCTGAGAA          |

|                                       |   |                      |                      |  |
|---------------------------------------|---|----------------------|----------------------|--|
| rs47741975                            |   |                      |                      |  |
| <i>Hdac4</i> , CAST<br>rs33095036     | 1 | GGAGCATGATCGTACCTGCA | TGCAGGTACGATCATGCTCC |  |
| <i>Hdac4</i> , CAST<br>rs33090780     | 2 | AGTAACTTTCAAAGCAAAA  | TTTTGCTTTTGAAAGTTACT |  |
| <i>Hdac4</i> ,<br>129S1<br>rs33095034 | 1 | TTAGCTTTGGAAGATACAAT | ATTGTATCTTCCAAAGCTAA |  |
| <i>Hdac4</i> ,<br>129S1<br>rs33090216 | 2 | AAACGCACAGTCCCAACCAA | TTGGTTGGGACTGTGCGTTT |  |
| <i>Sox9</i> , CAST<br>rs27032449      | 1 | TGAAAGAAGGCTACAGTGAG | CTCACTGTAGCCTTCTTTCA |  |
| <i>Sox9</i> , CAST<br>rs27032331      | 2 | AGGTGTTGACCTCATCCCAG | CTGGGATGAGGTCAACACCT |  |
| <i>Sox9</i> , 129S1<br>rs27032530     | 1 | CACCATAGGGTAGGAGCTAC | GTAGCTCCTACCCTATGGTG |  |
| <i>Sox9</i> , 129S1<br>rs27032349     | 2 | GATTTCAACAACAGATGACA | TGTCATCTGTTGTTGAAATC |  |
| <i>Cistr</i> , CAST<br>rs37349197     | 1 | GCTCCCAGTCACCGGTAATG | CATTACCGGTGACTGGGAGC |  |
| <i>Cistr</i> , CAST<br>rs37589721     | 2 | TCACTGGCTCTCCAAACT   | AGTGTTTGGAGAGCCAGTGA |  |
| <i>Cistr</i> , 129S1<br>rs37810061    | 1 | GAACCTTTCAAACAAAGCAA | TTGCTTTGTTTGAAAGGTTT |  |
| <i>Cistr</i> , 129S1<br>rs51914516    | 2 | GCTACTGAGCTTGGAGCAGT | ACTGCTCCAAGCTCAGTAGC |  |
| <i>Firre</i> , CAST<br>rs30271762     | 1 | TTGTTTCCTCTTAACTGTGA | TCACAGTTAAGAGGAAACAA |  |
| <i>Firre</i> , CAST<br>rs30266026     | 2 | AAATGTTCTCTAATGACCAC | GTGGTCATTAGAGAACATTT |  |
| <i>Firre</i> , 129S1<br>rs30249067    | 1 | ACATGTACACATTCTTGTT  | AACAAGGAATGTGTACATGT |  |
| <i>Firre</i> , 129S1<br>rs30267596    | 2 | TCAAAGAAACACCTTCGTA  | TACGAAGGTGTTTCTTTTGA |  |

**Table S2: Time properties of 4D-experiments**

| Combination                                             | Total<br>number of<br>acquired<br>cells [n] | Total<br>number of<br>z-stacks | Mean of<br>time interval<br>[sec] | Total<br>imaging time<br>[h] | Average<br>imaging<br>time per<br>cell [min] |
|---------------------------------------------------------|---------------------------------------------|--------------------------------|-----------------------------------|------------------------------|----------------------------------------------|
| <b><i>FIRRE</i> - nucleolus</b>                         | 9                                           | 108                            | 146                               | 4.4                          | 29.1                                         |
| <b><i>GAPDH</i> - nucleolus</b>                         | 7                                           | 108                            | 154                               | 4.6                          | 39.4                                         |
| <b><i>Firre</i> – nucleolus<br/>(short intervals)</b>   | 8                                           | 78                             | 203                               | 4.5                          | 38.2                                         |
| <b><i>Firre</i> – nucleolus<br/>(sister-chromatids)</b> | 3                                           | 20                             | 1200                              | 6.7                          | 133.3                                        |
| <b><i>Firre</i> – nucleolus<br/>(apoptosis)</b>         | 5                                           | 29                             | 1200                              | 9.7                          | 116                                          |
